# Supplementary material for: Micronutrients and Renal Outcomes: A Prospective Cohort Study
Source: MDPI journal article supplement (doi:10.3390/nu14153063), 2022-07-26
Supplement: s1 [file s1]

Table S1. The parameter, regression equation, correlation coefficient, linear range, and recovery of the five trace elements

| Element | Mass<br>(amu) | Mode     | CH <sub>4</sub><br>(mL/min) | RPq  | Regression<br>equation | Linear range<br>(ng/mL) | Correlation<br>coefficient | Recovery<br>(%) |
|---------|---------------|----------|-----------------------------|------|------------------------|-------------------------|----------------------------|-----------------|
| Cu      | 65            | Standard | -                           | -    | $y = 0.022x + 0.000$   | 0.025-50                | 0.9999                     | 96.3± 17.1      |
| Zn      | 67            | Standard | -                           | -    | $y = 0.001x + 0.000$   | 0.250-50                | 0.9999                     | 90.0±34.8       |
| Cr      | 52            | DRC      | 0.8                         | 0.5  | $y = 0.077x - 0.001$   | 0.025-10                | 0.9999                     | 88.7±3.5        |
| Mn      | 55            | DRC      | 0.8                         | 0.5  | $y = 0.104x - 0.003$   | 0.025-5                 | 0.9999                     | 93.3±14.2       |
| Se      | 78            | DRC      | 0.3                         | 0.45 | $y = 0.001x - 0.000$   | 0.005-10                | 0.9998                     | 97.3±17.8       |

Abbreviations: DRC, dynamic reaction cell
